# Supplementary material for: Triple detection modes for Hg2+ sensing based on a NBD-fluorescent and colorimetric sensor and its potential in cell imaging
Source: Royal Society of Chemistry journal article supplement (doi:10.1039/c8nj01915k), 2018-01-01
Supplement: c8nj01915k1.pdf [file c8nj01915k1.pdf]

## Supplementary Information

### Triple detection modes for Hg<sup>2+</sup> sensing based on NBD-fluorescent and colorimetric sensor and its potential in cell imaging

Sasiwimon Kraithong,<sup>a</sup> Rapeepat Sangsuwan,<sup>b</sup> Nattawan Worawannotai,<sup>c</sup> Jitnapa Sirirak,<sup>c</sup>

Adisri Charoenpanich,<sup>d</sup> Patchanita Thamyongkit,<sup>a</sup> Nantanit Wanichachewa<sup>\*c</sup>

<sup>a</sup> Department of Chemistry, Faculty of Science, Chulalongkorn University, Bangkok 10330, Thailand

<sup>b</sup> Department of Chemistry, University of California, Berkeley CA 94720, USA

<sup>c</sup> Department of Chemistry, Faculty of Science, Silpakorn University, Nakhon Pathom 73000, Thailand

<sup>d</sup> Department of Biology, Faculty of Science, Silpakorn University, Nakhon Pathom 73000, Thailand

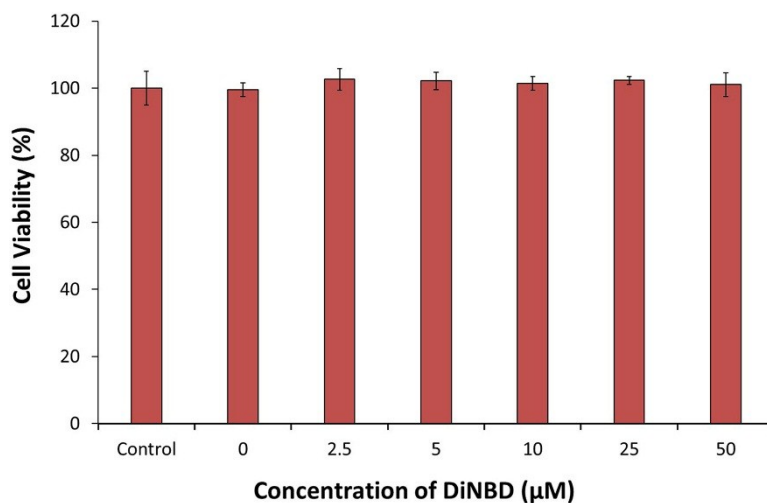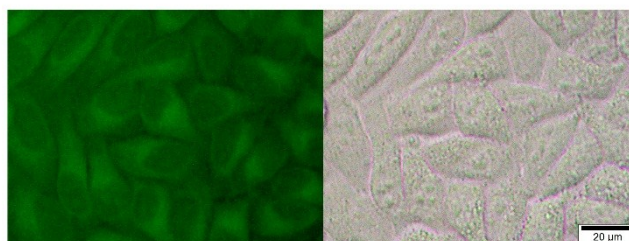

Retaining of DiNBD within the cells after 24 h in growth media.

**Fig. S1.** Cell viability values (%) estimated by Prestoblu<sup>TM</sup> Cell Viability reagent versus incubation concentrations of DiNBD. HeLa cells were incubated with DiNBD (2.5–50 µM) for 30 min (10% DMSO in PBS), and further cultured in growth media for 24 h before the cell viability assay. After 24 h culture, DiNBD remained within the cells but did not affect HeLa cell viability.

## Cell viability assay

Cell survival of HeLa after treatment with **DiNBD** was measured using Prestobblue™ Cell Viability reagent (Invitrogen, USA) according to the manufacturer's protocol. In brief, cells were seeded in 96 well plate at 20 kcells/well and incubated overnight. Cells were treated with different concentrations of **DiNBD** (10% DMSO in phenol red free DMEM) ranging from 2.5–50  $\mu$ M, and two negative controls of DMEM alone or DMEM with 10% DMSO, then incubated for 30 min. Cells were washed twice followed by 24 h incubation in growth media. The media was replaced with 10% Prestobblue reagent in fresh media and incubated for 2 hours. Data values were measured as OD reading at 570 nm with reference subtraction at 600 nm. Data were expressed as mean  $\pm$  SD of triplicate experiments. Cell viability was calculated using the following formula:  $100 \times [(OD_{570} \text{ of treated sample}) / (OD_{570} \text{ of untreated sample (DMEM alone)})]$ . Cell morphology and retaining of **DiNBD** within the cells at the maximum concentration test of 50  $\mu$ M **DiNBD** was visualized under inverted phase contrast/fluorescence microscope (Olympus CKX53/ DP27-2, 100W mercury burner).
